# Supplementary material for: Sensory-Guided Establishment of Sensory Lexicon and Investigation of Key Flavor Components for Goji Berry Pulp
Source: MDPI journal article supplement (doi:10.3390/plants13020173), 2024-01-08
Supplement: s1 [file s1]

**Table S1.** The information of the seven goji berry pulp.

| Brand          | Sample codes | Ingredients                                    | Origin of raw materials | Manufacturers                                    |
|----------------|--------------|------------------------------------------------|-------------------------|--------------------------------------------------|
| FU DONG HAI    | FDH          | Goji berry juice                               | Ningxia                 | Guangdong Fengchun Pharmaceutical Co.            |
| QING YUAN TANG | QYT          | Fresh wolfberry, Citric acid                   | Ningxia                 | Ningxia Fushou Kangning Health Biotechnology Co. |
| NINGANPU       | NAB          | Fresh wolfberry, Vitamin C, Citric acid        | Ningxia                 | Ningxia Ninganbao Local Specialties Co.          |
| RUNDEMANOR     | RDZY         | Fresh wolfberry, Vitamin C, Citric acid        | Ningxia                 | Ningxia Runde Biotechnology Co.                  |
| COFCO          | ZL           | Fresh wolfberry, Vitamin C, Citric acid, Water | Qinghai                 | Sirio Pharma Co., Ltd                            |
| QIZITOWN       | QZT          | /                                              | Ningxia                 | Qizitown (Ningxia) Health Industry Co.           |
| WOLFBERRY      | WFBR         | Goji berry juice                               | Ningxia                 | Ningxia Wolfram & Berry Wolfberry Industry Co.   |

**Table S2.** The information of authentic flavor standards for qualitative and quantitation of aroma-active compounds.

| Flavor standards     | CAS       | Manufacturers | Purity |
|----------------------|-----------|---------------|--------|
| <b>Acids</b>         |           |               |        |
| Butyric Acid         | 107-92-6  | Sigma-Aldrich | >99%   |
| Hexanoic acid        | 142-62-1  | Macklin       | >99%   |
| 2-Ethylhexanoic acid | 149-57-5  | Aladdin       | >99%   |
| Octanoic acid        | 124-07-2  | Aladdin       | >99%   |
| Decanoic acid        | 334-48-5  | Aladdin       | >99%   |
| <b>Aldehydes</b>     |           |               |        |
| Hexanal              | 66-25-1   | Macklin       | >98%   |
| Trans-2-Hexenal      | 6728-26-3 | Aladdin       | >98%   |
| Octanal              | 124-13-0  | Macklin       | >99%   |

|                                  |            |               |      |
|----------------------------------|------------|---------------|------|
| (E)-Hept-2-enal                  | 18829-55-5 | Aladdin       | >99% |
| 1-Nonanal                        | 124-19-6   | Macklin       | >95% |
| (E)-2-Octenal                    | 2548-87-0  | Macklin       | >95% |
| trans,trans-2,4-Heptadienal      | 4314-03-5  | Macklin       | >90% |
| 2,6-Nonadienal, (E,Z)-           | 557-48-2   | Aladdin       | >95% |
| <b>Lactones</b>                  |            |               |      |
| $\delta$ -Hexalactone            | 823-22-3   | Aladdin       | >99% |
| $\gamma$ -Octanoic lactone       | 104-50-7   | Macklin       | >99% |
| 5-Hydroxyoctanoic acid lactone   | 698-76-0   | Macklin       | >98% |
| $\gamma$ -Decalactone            | 706-14-9   | Aladdin       | >98% |
| Undecanolactone                  | 710-04-3   | Aladdin       | >98% |
| $\delta$ -Dodecalactone          | 713-95-1   | Sigma-Aldrich | >98% |
| <b>Esters</b>                    |            |               |      |
| Ethyl acetate                    | 141-78-6   | Macklin       | >99% |
| Amyl acetate                     | 628-63-7   | DrE           | >99% |
| Isoamyl acetate                  | 123-92-2   | Macklin       | >99% |
| Methyl hexanoate                 | 106-70-7   | Macklin       | >99% |
| Ethyl lactate                    | 97-64-3    | Macklin       | >99% |
| Caprylic acid methyl ester       | 111-11-5   | Adamas        | >99% |
| Heptyl acetate                   | 112-06-1   | TCI           | >98% |
| Ethyl 3-hydroxybutyrate          | 5405-41-4  | Macklin       | >99% |
| 2-hydroxy4-methyl ethyl valerate | 10348-47-4 | Aladdin       | >98% |
| Methyl salicylate                | 119-36-8   | Macklin       | >99% |
| Palmitic acid ethyl ester        | 628-97-7   | Adamas        | >99% |
| <b>Ketone</b>                    |            |               |      |
| 1-Octen-3-one                    | 4312-99-6  | Macklin       | >96% |

|                                                                         |            |                                         |      |
|-------------------------------------------------------------------------|------------|-----------------------------------------|------|
| 2-Nonanone                                                              | 821-55-6   | Macklin                                 | >99% |
| <b>Terpenoids</b>                                                       |            |                                         |      |
| (+)-Dipentene                                                           | 5989-27-5  | TCI                                     | >99% |
| Terpinolene                                                             | 586-62-9   | TCI                                     | >90% |
| 4-Methyl-2-(2-methyl-1-propenyl)tetrahydropyran (cis-and trans-mixture) | 16409-43-1 | Sigma-Aldrich                           | >99% |
| Linalool                                                                | 78-70-6    | Macklin                                 | >98% |
| Citronellyl acetate                                                     | 150-84-5   | Aladdin                                 | >95% |
| Citronellol                                                             | 106-22-9   | Shanghai yuanye Bio-Technology Co., Ltd | >98% |
| alpha-Terpineol                                                         | 98-55-5    | Aladdin                                 | >95% |
| Citral                                                                  | 5392-40-5  | Macklin                                 | >98% |
| Nerol                                                                   | 106-25-2   | Adamas                                  | >97% |
| Geranic acid                                                            | 459-80-3   | alfa aesar                              | >98% |
| Farnesol                                                                | 4602-84-0  | alfa aesar                              | >95% |
| <b>Volatile phenols</b>                                                 |            |                                         |      |
| 2-Methoxy-4-methylphenol                                                | 93-51-6    | Aladdin                                 | >98% |
| o-Cresol                                                                | 95-48-7    | Aladdin                                 | >99% |
| 4-Ethyl-2-methoxyphenol                                                 | 2785-89-9  | Aladdin                                 | >98% |
| 4-Hydroxy-3-methoxystyrene                                              | 7786-61-0  | Sigma-Aldrich                           | >98% |
| p-Cresol                                                                | 106-44-5   | Macklin                                 | >99% |
| m-Cresol                                                                | 108-39-4   | Aladdin                                 | >99% |
| Eugenol                                                                 | 97-53-0    | Macklin                                 | >98% |
| 4-Ethylphenol                                                           | 123-07-9   | CNW                                     | >99% |
| 3-Ethylphenol                                                           | 620-17-7   | DrE                                     | >98% |
| 4-Hydroxystyrene                                                        | 2628-17-3  | Jkchemical                              | >99% |
| Guaiacol                                                                | 90-05-1    | TCI                                     | >99% |

**Furan**

|                   |           |               |      |
|-------------------|-----------|---------------|------|
| Furfural          | 35796     | Sigma-Aldrich | >99% |
| 2-Acetylfuran     | 1192-62-7 | Sigma-Aldrich | >99% |
| 5-Methyl furfural | 620-02-0  | Macklin       | >99% |
| Furfuryl alcohol  | 98-00-0   | Adamas        | >98% |

**Alcohol**

|                     |            |               |      |
|---------------------|------------|---------------|------|
| 2-Methyl-1-propanol | 78-83-1    | Aladdin       | >99% |
| 1-Pentanol          | 71-41-0    | Macklin       | >99% |
| 3-Methyl-1-butanol  | 123-51-3   | Aladdin       | >99% |
| 2-Heptanol          | 543-49-7   | Aladdin       | >98% |
| cis-6-Nonen-1-ol    | 35854-86-5 | Aladdin       | >95% |
| 1-Octen-3-ol        | 3391-86-4  | Sigma-Aldrich | >99% |
| 2,3-Butanediol      | 513-85-9   | Macklin       | >98% |
| 1-Octanol           | 111-87-5   | Macklin       | >99% |

**Pyrazines**

|                              |            |               |      |
|------------------------------|------------|---------------|------|
| 2,3-Dimethyl-5-ethylpyrazine | 15707-34-3 | Sigma-Aldrich | >98% |
| Acetylpyrazine               | 22047-25-2 | Sigma-Aldrich | >97% |

**Benzene ring**

|             |          |         |      |
|-------------|----------|---------|------|
| o-Xylene    | 95-47-6  | Macklin | >99% |
| Styrene     | 100-42-5 | Macklin | >99% |
| Naphthalene | 91-20-3  | Macklin | >99% |

**C13- norisoprenoid**

|         |            |         |      |
|---------|------------|---------|------|
| Irisone | 14901-07-6 | Aladdin | >97% |
|---------|------------|---------|------|

---

**Table S3.** The load factor of sensory descriptors in each principal component

| Sensory attributes        | F1     | F2     | F3     | F4     | F5     |
|---------------------------|--------|--------|--------|--------|--------|
| <b>Aroma</b>              |        |        |        |        |        |
| Goji berry                | 0.520  | 0.293  | -0.386 | 0.359  | -0.522 |
| Tomato                    | 0.554  | 0.702  | -0.365 | 0.117  | 0.139  |
| Roast sweet potatoes      | -0.039 | -0.343 | -0.080 | 0.716  | 0.601  |
| Pumpkin                   | 0.577  | -0.772 | 0.236  | 0.100  | 0.020  |
| Hay                       | 0.486  | 0.375  | -0.360 | -0.227 | 0.665  |
| Sweet                     | -0.580 | -0.255 | -0.719 | 0.203  | -0.100 |
| Acetic acid               | -0.811 | 0.350  | 0.264  | 0.310  | 0.092  |
| Honey                     | 0.616  | 0.295  | 0.127  | 0.688  | 0.083  |
| Jujube                    | -0.834 | -0.387 | 0.036  | -0.113 | 0.263  |
| <b>Flavor / mouthfeel</b> |        |        |        |        |        |
| Acidity                   | 0.665  | -0.709 | -0.209 | -0.079 | 0.059  |
| Sweetness                 | -0.416 | 0.803  | 0.142  | -0.062 | 0.237  |
| Bitter                    | -0.068 | -0.436 | -0.521 | -0.693 | 0.097  |
| Astringency               | 0.281  | -0.757 | 0.417  | 0.376  | 0.021  |
| Goji berry                | 0.628  | 0.688  | 0.291  | -0.162 | -0.148 |
| Tomato                    | 0.913  | -0.258 | 0.184  | -0.201 | -0.043 |
| Granularity               | -0.431 | -0.016 | 0.863  | -0.262 | -0.011 |
| Viscosity                 | -0.821 | -0.154 | -0.309 | 0.332  | -0.311 |

a: Values with eigenvectors greater than 0.500 are in red; values with eigenvectors less than -0.500 are in blue.

**Table S4.** Volatile aroma substance content in different goji berry pulps.

| No.             | Compounds              | Odor quality <sup>a</sup>       | FDH                          | NAB               | QYT             | QZT                          | RDZY                        | WFBR                         | ZL                          |
|-----------------|------------------------|---------------------------------|------------------------------|-------------------|-----------------|------------------------------|-----------------------------|------------------------------|-----------------------------|
| <b>Acids</b>    |                        |                                 |                              |                   |                 |                              |                             |                              |                             |
| AC1             | Butyric acid           | Acid                            | 155.98 ± 14.23 <sup>ab</sup> | 8.26 ± 1.33 d     | 87.18 ± 7.70 b  | 19.48 ± 2.84 d               | 14.55 ± 1.78 d              | 43.50 ± 6.54 c               | 13.17 ± 4.28 d              |
| AC2             | Hexanoic acid          | Cheese, fatty                   | 88.41 ± 5.95 c               | 678.38 ± 156.25 a | 129.64 ± 4.13 c | 259.31 ± 43.12 <sup>bc</sup> | 339.24 ± 91.84 <sup>b</sup> | 254.62 ± 31.18 <sup>bc</sup> | 329.49 ± 77.77 <sup>b</sup> |
| AC3             | 2-Ethylhexanoic acid   | Cheese                          | Tr <sup>c</sup>              | 1.83 ± 0.45 b     | 1.48 ± 0.40 b   | 1.30 ± 0.02 b                | 17.53 ± 6.29 a              | 2.24 ± 0.07 b                | 10.82 ± 2.88 a              |
| AC4             | Octanoic Acid          | Cheese, fatty                   | 5.04 ± 0.16                  | 28.29 ± 14.16     | 6.11 ± 0.50     | 14.10 ± 0.69                 | 19.95 ± 6.38                | 20.34 ± 1.65                 | 15.72 ± 5.45                |
| AC5             | Decanoic acid          | Acid, fatty                     | 1.71 ± 0.12                  | 4.54 ± 3.29       | 1.65 ± 0.04     | 1.34 ± 0.08                  | 4.05 ± 0.97                 | 4.30 ± 0.29                  | 2.21 ± 1.17                 |
| AC6             | Benzoic acid           | Fatty                           | 22.46 ± 7.95 b               | 54.74 ± 31.54 b   | 55.60 ± 1.10 b  | 46.72 ± 1.38 b               | 41.37 ± 4.23 b              | 99.53 ± 6.61 a               | 41.78 ± 20.89 <sup>b</sup>  |
| <b>Aldehyde</b> |                        |                                 |                              |                   |                 |                              |                             |                              |                             |
| A1              | Hexanal                | Apple-like, green grass, citrus | 3.87 ± 0.32 c                | 20.08 ± 0.27 b    | 3.69 ± 1.13 c   | 45.94 ± 7.64 a               | 6.21 ± 0.93 c               | 9.36 ± 0.12 c                | 8.90 ± 0.82 c               |
| A2              | (E)-2-Hexenal          | Green grass, banana-like        | 0.23 ± 0.00 d                | 5.32 ± 1.07 b     | 0.36 ± 0.04 d   | 2.58 ± 0.25 c                | 2.73 ± 0.12 c               | 2.51 ± 0.07 c                | 7.94 ± 0.29 a               |
| A3              | Octanal                | Fruity, green grass, lemon      | 0.66 ± 0.64 b                | 0.84 ± 0.47 b     | 0.80 ± 0.29 b   | tr                           | 0.24 ± 0.03 b               | 2.91 ± 1.23 b                | 7.71 ± 3.76 a               |
| A4              | (E)-2-Heptenal         | Green grass, fatty              | tr                           | 1.62 ± 0.32       | tr              | tr                           | 0.25 ± 0.01                 | 0.98 ± 0.57                  | 2.67 ± 2.62                 |
| A5              | Nonanal                | Fatty, rose, citrus             | tr                           | 0.75 ± 0.00 b     | tr              | tr                           | tr                          | 0.59 ± 0.00 c                | 1.17 ± 0.00 a               |
| A6              | (E)-2-Octenal          | Green grass, nutty              | tr                           | 0.78 ± 0.21       | tr              | tr                           | 0.24 ± 0.09                 | 0.68 ± 0.24                  | 0.83 ± 0.64                 |
| A7              | (E,E)-2, 4-heptadienal | Nutty, fatty                    | tr                           | 8.99 ± 3.93       | 2.73 ± 0.40     | tr                           | 2.77 ± 1.11                 | 8.97 ± 3.55                  | 11.12 ± 6.93                |
| A8              | (E,Z)-2, 6-Nonadienal  | Green grass, cucumber           | 0.19 ± 0.02 abc              | 0.13 ± 0.00 cd    | 0.16 ± 0.01 bcd | 0.20 ± 0.06 ab               | 0.15 ± 0.02 <sup>bcd</sup>  | 0.23 ± 0.00 a                | 0.13 ± 0.02 d               |
| A9              | Benzeneacetaldehyde    | Floral, rose,                   | 15.87 ± 3.22 b               | 30.51 ± 7.54 a    | 19.69 ± 3.76 b  | 31.80 ± 0.85 a               | 30.57 ± 6.27 a              | 12.13 ± 0.95 b               | 33.44 ± 0.19 a              |

|                 |                  |                   |                                                         |                       |                    |                        |                        |                         |                         |                    |
|-----------------|------------------|-------------------|---------------------------------------------------------|-----------------------|--------------------|------------------------|------------------------|-------------------------|-------------------------|--------------------|
| A10<br>Lactones | 2E,4E-decadienal | cherry<br>/       | tr                                                      | 0.15 ± 0.07           | tr                 | tr                     | 0.08 ± 0.00            | 0.18 ± 0.05             | 0.14 ± 0.00             |                    |
|                 | L1               | δ-Hexalactone     | Creamy,<br>fruity,<br>coconut                           | 15.12 ± 1.28<br>cd    | 15.96 ± 5.76 cd    | 22.90 ± 1.96 bc        | 8.06 ± 0.73 d          | 21.86 ± 2.80<br>bc      | 36.72 ± 6.54 a          | 28.46 ± 9.66<br>ab |
|                 | L2               | γ-Octalactone     | Sweet,<br>coconut,<br>creamy                            | 5.00 ± 0.63 bc        | 4.81 ± 1.53 bc     | 6.21 ± 0.22 b          | 3.49 ± 0.00 c          | 5.00 ± 0.79 bc          | 8.23 ± 0.35 a           | 3.83 ± 0.48 c      |
|                 | L3               | σ-Octalactone     | Sweet,<br>coconut<br>creamy                             | 1.67 ± 0.00 b         | 19.12 ± 10.14 a    | 1.62 ± 0.17 b          | 4.99 ± 0.55 b          | 9.53 ± 2.07 ab          | 9.08 ± 0.73 b           | 8.72 ± 2.75 b      |
|                 | L4               | γ-Decalactone     | Peach-like,<br>coconut,<br>sweet                        | tr                    | tr                 | 3.06 ± 0.00 a          | tr                     | tr                      | 2.10 ± 0.00 b           | tr                 |
|                 | L5               | δ-Undecalactone   | Creamy,<br>fatty,<br>coconut,<br>fruity, peach-<br>like | 0.79 ± 0.00           | 2.40 ± 0.00        | tr                     | 0.88 ± 0.02            | 0.56 ± 0.14             | 1.88 ± 1.46             | 0.53 ± 0.22        |
|                 | L6               | δ-Dodecalactone   | Peach-like,<br>sweet                                    | 0.70 ± 0.02 c         | 1.89 ± 0.00 a      | tr                     | 0.56 ± 0.00 c          | 1.16 ± 0.00 b           | 0.78 ± 0.24 c           | 0.76 ± 0.10 c      |
|                 | Esters           |                   |                                                         |                       |                    |                        |                        |                         |                         |                    |
| E1              | Ethyl acetate    | Fruity, sweet     | 737.39 ±<br>141.72 d                                    | 2684.66 ± 222.04<br>a | 973.50 ± 747.14 cd | 1705.18 ±<br>128.22 bc | 2334.74 ±<br>146.27 ab | 1615.29 ±<br>147.69 bcd | 1457.25 ±<br>592.98 bcd |                    |
| E2              | Pentyl acetate   | Fruity,<br>banana | 2.69 ± 1.02 c                                           | 1.05 ± 0.00 d         | 1.23 ± 0.00 d      | 2.65 ± 0.19 c          | 5.39 ± 0.00 b          | 25.37 ± 0.66 a          | 0.84 ± 0.00 d           |                    |
| E3              | Isoamyl Acetate  | Sweet, fruity     | tr                                                      | 0.41 ± 0.09 b         | tr                 | tr                     | tr                     | 0.79 ± 0.10 a           | 0.34 ± 0.00 b           |                    |
| E4              | Methyl hexanoate | Fruity, sweet     | 2.23 ± 0.96 e                                           | 14.46 ± 0.73 bc       | 2.47 ± 2.33 e      | 20.11 ± 3.15 ab        | 25.12 ± 1.59 a         | 7.08 ± 5.32 de          | 10.02 ± 1.41<br>cd      |                    |
| E5              | Ethyl lactate    | Fruity,           | 1.28 ± 0.00 c                                           | 2.01 ± 0.00 bc        | 3.94 ± 2.00 b      | tr                     | 2.09 ± 0.00 bc         | 6.75 ± 0.47 a           | 1.84 ± 0.61 bc          |                    |

|                   |                                       |                                     |                  |                 |                |                |                |                  |                |
|-------------------|---------------------------------------|-------------------------------------|------------------|-----------------|----------------|----------------|----------------|------------------|----------------|
|                   |                                       | creamy                              |                  |                 |                |                |                |                  |                |
| E6                | Methyl octanoate                      | Fruity, citrus                      | 0.06 ± 0.00 c    | 0.58 ± 0.13 b   | tr             | 0.42 ± 0.00 b  | 0.85 ± 0.16 a  | 0.17 ± 0.08 c    | 1.05 ± 0.08 a  |
| E7                | Acetic acid, heptyl ester             | Fresh, fruity, apricot              | 0.06 ± 0.03 c    | 1.28 ± 0.16 a   | 0.09 ± 0.06 c  | 0.72 ± 0.06 ab | 0.56 ± 0.01 bc | 0.66 ± 0.16 bc   | 1.06 ± 0.63 ab |
| E8                | Butanoic acid, 3-hydroxy-,ethyl ester | Grape, fruity, roast                | tr               | 17.23 ± 8.90    | 0.54 ± 0.00    | tr             | tr             | 5.28 ± 1.61      | 24.15 ± 9.37   |
| E9                | Ethyl DL-2-Hydroxy-4-methylvalerate   | Fresh, black berry                  | 87.99 ± 10.77 ab | 76.62 ± 6.69 bc | 27.07 ± 3.38 d | 74.13 ± 0.64 c | 95.69 ± 3.82 a | 83.99 ± 6.21 abc | 24.99 ± 3.38 d |
| E10               | Methyl salicylate                     | Green grass                         | 0.86 ± 0.08 c    | 2.49 ± 0.95 ab  | 0.67 ± 0.18 c  | 1.29 ± 0.15 bc | 2.65 ± 0.88 a  | 0.85 ± 0.23 c    | 0.64 ± 0.03 c  |
| E11               | Ethyl phenylacetate                   | Sweet, floral, honey, rose          | 0.04 ± 0.01 ab   | tr              | 0.05 ± 0.01 a  | tr c           | 0.03 ± 0.00 ab | 0.02 ± 0.02 bc   | tr             |
| E12               | Ethyl palmitate                       | Fruity, creamy                      | 0.47 ± 0.00 b    | 0.22 ± 0.00 b   | tr             | tr             | tr             | 1.27 ± 0.25 a    | 0.51 ± 0.00 b  |
| <b>Ketones</b>    |                                       |                                     |                  |                 |                |                |                |                  |                |
| K1                | 1-Octen-3-one                         | Mushroom, earthy                    | tr               | 0.59 ± 0.13 b   | tr             | tr             | tr             | 0.41 ± 0.09 b    | 1.45 ± 0.00 a  |
| K2                | 6-Methyl-5-heptene-2-one              | Apple-like, banana, mung bean       | 0.46 ± 0.13 c    | 9.06 ± 0.67 a   | 0.72 ± 0.35 c  | 3.02 ± 0.30 bc | 2.76 ± 0.26 bc | 5.75 ± 1.23 ab   | 6.49 ± 4.07 ab |
| K3                | 2-Nonanone                            | Cheese, green grass, fruity, earthy | 0.14 ± 0.00 e    | 1.57 ± 0.26 c   | 0.10 ± 0.00 e  | 1.10 ± 0.05 d  | 2.35 ± 0.34 b  | 0.42 ± 0.23 e    | 2.93 ± 0.20 a  |
| <b>Terpenoids</b> |                                       |                                     |                  |                 |                |                |                |                  |                |
| T1                | D-Limonene                            | Green grass, Apple-like, citrus     | 0.18 ± 0.04      | 0.81 ± 0.19     | tr             | 0.71 ± 0.54    | 0.78 ± 0.21    | 0.24 ± 0.04      | 0.38 ± 0.18    |
| T2                | Terpinolene                           | Fresh, woody, sweet, citrus         | tr               | 0.15 ± 0.04 b   | tr             | 0.06 ± 0.00 b  | 0.40 ± 0.12 a  | 0.13 ± 0.00 b    | 0.17 ± 0.03 b  |
| T3                | trans-Rose oxide                      | Floral, rose                        | tr               | tr              | 2.68 ± 0.15 c  | tr             | tr             | 13.32 ± 0.00 a   | 5.22 ± 0.00 b  |



|                         |                            |                                         |                |                 |                |                |                |                |                |
|-------------------------|----------------------------|-----------------------------------------|----------------|-----------------|----------------|----------------|----------------|----------------|----------------|
| <b>T4</b>               | Citronellal                | Lemon, green grass                      | tr             | 0.24 ± 0.06 b   | 0.07 ± 0.00 c  | 0.07 ± 0.00 c  | 0.12 ± 0.00 c  | 0.29 ± 0.04 b  | 0.43 ± 0.01 a  |
| <b>T5</b>               | Linalool                   | Citrus, floral, sweet, rose             | 0.43 ± 0.10 b  | 1.14 ± 0.28 a   | 0.39 ± 0.13 b  | 0.57 ± 0.01 b  | 1.29 ± 0.29 a  | 1.42 ± 0.34 a  | 1.24 ± 0.12 a  |
| <b>T6</b>               | Citronellyl acetate        | Floral, green grass, rose, fruity       | tr             | 0.41 ± 0.12     | tr             | tr             | 0.26 ± 0.00    | 0.41 ± 0.07    | 0.35 ± 0.09    |
| <b>T7</b>               | Citronellol                | Citrus, green grass, sweet              | tr             | 0.08 ± 0.00 a   | tr             | tr             | 0.07 ± 0.00 c  | 0.07 ± 0.00 b  | tr             |
| <b>T8</b>               | α-Terpineol                | Rosin, clove, floral, citrus            | tr             | tr              | tr             | tr             | 0.48 ± 0.39    | 0.48 ± 0.04    | 0.22 ± 0.00    |
| <b>T9</b>               | Citral                     | Lemon, sweet                            | tr             | 0.12 ± 0.05     | tr             | tr             | 0.04 ± 0.00    | 0.07 ± 0.01    | 0.06 ± 0.04    |
| <b>T10</b>              | Nerol                      | Sweet, citrus                           | 0.68 ± 0.19 d  | 13.72 ± 0.09 a  | 1.16 ± 0.15 d  | 4.92 ± 0.32 c  | 6.94 ± 1.93 bc | 9.61 ± 1.34 b  | 5.85 ± 3.00 c  |
| <b>T11</b>              | Geranic acid               | Green                                   | 2.19 ± 0.17 b  | 6.68 ± 2.90 a   | 2.30 ± 0.01 b  | 5.75 ± 0.19 a  | 2.38 ± 0.29 b  | 2.28 ± 0.05 b  | 2.28 ± 0.23 b  |
| <b>T12</b>              | Farnesol                   | Sweet , floral                          | 0.20 ± 0.00    | 1.00 ± 0.60     | tr             | 0.31 ± 0.02    | 0.35 ± 0.10    | 0.55 ± 0.06    | 0.30 ± 0.14    |
| <b>Volatile phenols</b> |                            |                                         |                |                 |                |                |                |                |                |
| <b>P1</b>               | 4-Methylguaiaicol          | Clove, woody, smoky Chinese traditional | tr             | 7.70 ± 0.00 a   | tr             | tr             | tr             | 6.22 ± 0.00 b  | tr             |
| <b>P2</b>               | o-Cresol                   | medicine, leather, smoky                | tr             | 2.15 ± 0.00 a   | tr             | 1.66 ± 0.00 b  | tr             | 2.53 ± 0.21 a  | tr             |
| <b>P3</b>               | Phenol, 4-ethyl-2-methoxy- | Smoky, clove                            | tr             | 6.71 ± 0.00 b   | tr             | tr             | 6.54 ± 0.00 b  | 9.32 ± 0.55 a  | 6.47 ± 0.00 b  |
| <b>P4</b>               | 4-Vinylguaiaicol           | Caramel                                 | 10.97 ± 0.60 b | 69.70 ± 37.73 a | 8.98 ± 0.43 b  | 26.78 ± 1.71 b | 20.51 ± 5.60 b | 33.77 ± 2.25 b | 14.93 ± 1.27 b |
| <b>P5</b>               | p-Cresol                   | Green grass,flora, animal               | 5.42 ± 0.01 c  | 5.92 ± 0.40 ab  | 5.56 ± 0.01 bc | 5.67 ± 0.11 bc | 5.53 ± 0.06 bc | 6.16 ± 0.10 a  | 5.45 ± 0.12 c  |
| <b>P6</b>               | m-Cresol                   | Medicinal                               | 6.38 ± 0.93    | 5.94 ± 0.31     | 6.56 ± 0.38    | 5.64 ± 0.27    | 5.69 ± 0.17    | 8.50 ± 1.92    | 5.85 ± 0.62    |

|                |                  |                                              |                       |                       |                    |                 |                       |                      |                      |
|----------------|------------------|----------------------------------------------|-----------------------|-----------------------|--------------------|-----------------|-----------------------|----------------------|----------------------|
| P7             | Eugenol          | incense,<br>woody<br>Clove,<br>honey , spice | tr                    | 72.90 ± 1.87          | tr                 | tr              | 71.48 ± 0.66          | 72.84 ± 0.43         | tr                   |
| P8             | 4-Ethylphenol    | Green grass,<br>cheese                       | 1.89 ± 0.08           | 2.34 ± 0.38           | 2.24 ± 0.10        | tr              | 2.55 ± 0.30           | 2.91 ± 0.18          | 3.38 ± 0.72          |
| P9             | 3-ethylphenol    | Smoky, sweet                                 | 1.85 ± 0.00 c         | 2.07 ± 0.00 a         | tr                 | tr              | tr                    | 2.06 ± 0.00 b        | tr                   |
| P10            | 4-Vinylphenol    | Almond                                       | 87.33 ± 0.94          | 163.59 ± 52.27        | 86.63 ± 0.63       | 115.70 ± 3.57   | 112.73 ± 12.91        | 132.35 ± 7.11        | 100.99 ± 10.06       |
| P11            | Guaiacol         | Smoky                                        | tr                    | 13.11 ± 4.04          | tr                 | 7.23 ± 0.89     | 7.10 ± 1.49           | 8.74 ± 0.50          | 6.95 ± 0.95          |
| <b>Furans</b>  |                  |                                              |                       |                       |                    |                 |                       |                      |                      |
| F1             | Furfural         | Sweet,<br>almond                             | 1949.19 ±<br>416.96 a | 443.61 ± 145.47<br>cd | 1229.66 ± 212.94 b | 191.50 ± 9.92 d | 802.83 ±<br>179.80 bc | 653.75 ± 47.95<br>cd | 867.60 ± 13.43<br>bc |
| F2             | Acetylfuran      | Sweet, nutty                                 | 55.31 ± 10.45<br>b    | 35.68 ± 9.79 bc       | 34.76 ± 3.00 bc    | 21.07 ± 1.94 c  | 78.66 ± 20.61<br>a    | 25.18 ± 1.48 c       | 79.62 ± 5.78 a       |
| F3             | 5-Methylfurfural | Creamy                                       | 15.31 ± 3.23 b        | 4.46 ± 1.25 d         | 14.40 ± 0.53 bc    | 1.61 ± 0.27 d   | 13.35 ± 3.69<br>bc    | 9.78 ± 0.06 c        | 21.42 ± 1.97 a       |
| F4             | Furfuryl alcohol | Alcohol ,<br>chemical,<br>sweet,<br>creamy   | 255.41 ± 11.04        | 212.18 ± 66.11        | 209.36 ± 12.08     | 247.72 ± 17.44  | 355.23 ± 20.99        | 243.50 ± 34.47       | 403.10 ±<br>119.51   |
| <b>Alcohol</b> |                  |                                              |                       |                       |                    |                 |                       |                      |                      |
| O1             | Isobutanol       | Alcohol                                      | 0.61 ± 0.24           | tr                    | 0.22 ± 0.07        | tr              | 0.52 ± 0.00           | 0.85 ± 0.83          | 0.80 ± 0.07          |
| O2             | 1-Pentanol       | Sweet, oil                                   | 5.92 ± 0.71 d         | 23.19 ± 1.72 ab       | 7.30 ± 1.60 cd     | 24.48 ± 0.65 a  | 12.26 ± 1.35<br>bcd   | 18.25 ± 0.96<br>abc  | 24.95 ± 13.07<br>a   |
| O3             | Isopentanol      | Fruity,<br>banana                            | 20.77 ± 4.02          | 19.99 ± 2.22          | 25.11 ± 14.27      | 11.63 ± 0.61    | 23.52 ± 0.04          | 30.25 ± 9.93         | 18.37 ± 3.41         |
| O4             | 2-Heptanol       | Fruity, plant-<br>like                       | 0.12 ± 0.02 b         | tr                    | 0.17 ± 0.00 a      | tr              | tr                    | 0.17 ± 0.00 a        | 0.12 ± 0.01 b        |
| O5             | (Z)-6-Nonenol    | Green grass,<br>cucumber                     | 0.97 ± 0.07 e         | 84.68 ± 7.65 a        | 1.48 ± 0.42 e      | 23.59 ± 0.20 d  | 44.45 ± 4.39 c        | 72.87 ± 6.15 b       | 70.20 ± 5.41 b       |
| O6             | 1-Octen-3-ol     | Mushroom                                     | 0.35 ± 0.00 d         | 3.36 ± 0.49 a         | 0.47 ± 0.00 cd     | 1.86 ± 0.18 bc  | 1.61 ± 0.16<br>bcd    | 1.73 ± 0.34<br>bcd   | 2.76 ± 1.48 ab       |

|                                      |                               |                                     |                 |                  |                 |                 |                    |                     |                |
|--------------------------------------|-------------------------------|-------------------------------------|-----------------|------------------|-----------------|-----------------|--------------------|---------------------|----------------|
| <b>O7</b>                            | 2, 3-Butanediol               | Creamy,<br>buttery                  | 7.42 ± 3.10 bc  | 6.64 ± 1.53 c    | 6.53 ± 1.22 c   | 5.37 ± 0.00 c   | 7.92 ± 0.83 bc     | 11.60 ± 2.59<br>ab  | 15.15 ± 2.47 a |
| <b>O8</b>                            | 1-octanol                     | Woody, green<br>grass,<br>blueberry | 0.21 ± 0.06     | 0.65 ± 0.25      | 0.31 ± 0.08     | 0.46 ± 0.02     | 0.80 ± 0.31        | 0.87 ± 0.05         | 0.82 ± 0.30    |
| <b>O9</b>                            | 2-Phenylethanol               | Citrus, rose                        | 75.09 ± 3.52 bc | 73.19 ± 15.21 bc | 102.18 ± 6.95 a | 70.69 ± 7.41 bc | 76.13 ± 9.03<br>bc | 81.76 ± 2.82 b      | 58.83 ± 7.15 c |
| <b>Pyrazines</b>                     |                               |                                     |                 |                  |                 |                 |                    |                     |                |
| <b>PY1</b>                           | 5-Ethyl-2, 3-dimethylpyrazine | Caramel,<br>roast                   | 0.65 ± 0.12 a   | tr               | 0.74 ± 0.01 a   | tr              | 0.05 ± 0.07 c      | 0.27 ± 0.04 b       | tr             |
| <b>PY2</b>                           | Acetylpyrazine                | Roast                               | 1.02 ± 0.28 ab  | 0.48 ± 0.30 c    | 1.31 ± 0.04 a   | 0.31 ± 0.04 c   | 0.24 ± 0.01 c      | 0.39 ± 0.14 c       | 0.61 ± 0.26 bc |
| <b>Benzenes</b>                      |                               |                                     |                 |                  |                 |                 |                    |                     |                |
| <b>B1</b>                            | o-Xylene                      | Sweet, floral                       | 21.25 ± 8.46    | 19.57 ± 2.61     | 1.20 ± 1.14     | 27.51 ± 10.98   | 25.29 ± 18.19      | 45.00 ± 36.16       | 5.98 ± 1.72    |
| <b>B2</b>                            | Styrene                       | Floral                              | tr              | 0.08 ± 0.03      | tr              | 0.25 ± 0.11     | 0.25 ± 0.07        | tr                  | 0.30 ± 0.00    |
| <b>B3</b>                            | p-Cymene                      | Citrus,<br>lemon, fruity            | tr              | tr               | tr              | tr              | 0.04 ± 0.00 a      | 0.05 ± 0.00 a       | 0.03 ± 0.00 b  |
| <b>B4</b>                            | o-Cymene                      | /                                   | 0.05 ± 0.00 c   | 0.10 ± 0.05 c    | tr              | 0.09 ± 0.04 c   | 0.34 ± 0.06 a      | 0.24 ± 0.02 b       | 0.05 ± 0.00 c  |
| <b>B5</b>                            | Naphthalene                   | Hay                                 | tr              | 0.18 ± 0.00      | tr              | tr              | 0.15 ± 0.04        | 0.11 ± 0.01         | tr             |
| <b>B6</b>                            | 2-phenoxyethanol              | Rose, spice                         | 38.83 ± 0.33 b  | 38.54 ± 1.06 b   | 41.02 ± 0.14 b  | 39.40 ± 0.52 b  | 41.56 ± 1.31 b     | 118.63 ± 12.35<br>a | 39.74 ± 1.00 b |
| <b>C<sub>13</sub>-norisoprenoids</b> |                               |                                     |                 |                  |                 |                 |                    |                     |                |
| <b>C1</b>                            | Damascenone                   | Sweet, fruity                       | 0.11 ± 0.00 b   | 0.27 ± 0.11 a    | 0.10 ± 0.00 b   | 0.13 ± 0.00 b   | 0.10 ± 0.02 b      | 0.09 ± 0.00 b       | 0.18 ± 0.02 ab |
| <b>C2</b>                            | β-Ionone                      | Rose, violets                       | 0.35 ± 0.06 d   | 1.73 ± 0.53 a    | 0.30 ± 0.02 d   | 1.41 ± 0.08 ab  | 0.99 ± 0.30 bc     | 1.13 ± 0.05 bc      | 0.66 ± 0.22 cd |

<sup>a</sup> Odor quality references [26,39,41–44,61,62] & <http://foodflavorlab.cn/>;

<sup>b</sup> Data are expressed as mean ± standard deviation of repeated trials. Different letters indicate significant differences (p<0.05) ;

<sup>c</sup> "tr" indicate "trace".

**Table S5.** Standard regression coefficients of the volatile compounds to the aroma attribute variables.

| Attributes | No.              | Compounds                        | Standard coefficient <sup>a</sup> | VIP   | Odor quality <sup>d</sup>       |
|------------|------------------|----------------------------------|-----------------------------------|-------|---------------------------------|
| Goji berry | A8 <sup>b</sup>  | ( <i>E,Z</i> )-2,6-Nonadienal    | 0.298                             | 0.883 | Green grass, cucumber           |
|            | B1               | o-Xylene                         | 0.236                             | 1.090 | Sweet, floral                   |
|            | E9               | 2-hydroxy4-methyl ethyl valerate | 0.180                             | 1.111 | Fresh, blackberry               |
|            | A1               | Hexanal                          | 0.117                             | 1.193 | Apple-like, green grass, citrus |
|            | PY2 <sup>c</sup> | Acetylpyrazine                   | -0.114                            | 1.090 | Roast                           |
|            | L4               | $\gamma$ -Decalactone            | -0.135                            | 1.157 | Peach-like, coconut, sweetness  |
|            | P8               | 4-Ethylphenol                    | -0.162                            | 1.158 | Green grass, cheese             |
|            | O9               | Phenylethyl Alcohol              | -0.167                            | 1.039 | Citrus, rose                    |
| Tomato     | A8               | ( <i>E,Z</i> )-2,6-Nonadienal,   | 0.219                             | 1.307 | Green grass, cucumber           |
|            | B1               | o-Xylene                         | 0.184                             | 1.351 | Sweet, floral                   |
|            | E12              | Palmitic acid ethyl ester        | 0.176                             | 1.542 | Fruity, creamy                  |
|            | E9               | 2-hydroxy4-methyl ethyl valerate | 0.157                             | 0.854 | Fresh, blackberry               |
|            | P9               | 3-Ethylphenol                    | 0.154                             | 1.183 | Smoky, sweet                    |
|            | O1               | 2-Methyl-1-propanol              | 0.126                             | 0.886 | Alcohol                         |

|                      |     |                                  |        |       |                                        |
|----------------------|-----|----------------------------------|--------|-------|----------------------------------------|
|                      | AC6 | Benzoic acid                     | -0.125 | 0.893 | Fatty                                  |
|                      | AC3 | 2-Ethylhexanoic acid             | -0.147 | 0.801 | Cheese                                 |
|                      | E10 | Methyl salicylate                | -0.156 | 0.834 | Green grass                            |
|                      | O9  | Phenylethyl Alcohol              | -0.299 | 0.891 | Citrus, rose                           |
| Roast sweet potatoes | E11 | Benzeneacetic acid, ethyl ester  | 0.176  | 1.093 | Sweet, floral, honey, rose             |
|                      | F1  | Furfural                         | 0.171  | 0.822 | Sweet, almond                          |
|                      | E9  | 2-hydroxy4-methyl ethyl valerate | 0.149  | 1.090 | Fresh, blackberry                      |
|                      | E10 | Methyl salicylate                | 0.100  | 0.806 | Green grass                            |
|                      | A1  | Hexanal                          | -0.154 | 1.198 | Apple-like; green grass, citrus        |
|                      | O2  | 1-Pentanol                       | -0.207 | 1.212 | Sweet, oil                             |
| Pumpkin              | AC3 | 2-Ethylhexanoic acid             | 0.202  | 1.064 | Cheese                                 |
|                      | T2  | Terpinolene                      | 0.166  | 1.215 | Fresh, woody, sweet, citrus            |
|                      | K3  | 2-Nonanone                       | 0.130  | 1.075 | Cheese, green grass, fruity, petrichor |
|                      | E6  | Caprylic acid methyl ester       | 0.124  | 1.081 | Fruity, citrus-like                    |
| Hay                  | A8  | (E,Z)-2,6-Nonadienal             | 0.103  | 0.949 | Green grass, cucumber                  |
| Sweet                | F3  | 5-Methyl furfural                | 0.108  | 0.879 | Creamy                                 |

|             |     |                                     |        |       |                                                 |
|-------------|-----|-------------------------------------|--------|-------|-------------------------------------------------|
| Honey       | T11 | Geranic acid                        | -0.118 | 1.068 | Green                                           |
|             | P4  | 4-Hydroxy-3-methoxystyrene          | -0.090 | 1.287 | Smoky, sweet                                    |
|             | P2  | o-Cresol                            | -0.094 | 1.106 | Chinese traditional<br>medicine, leather, smoky |
|             | E9  | 2-hydroxy4-methyl ethyl<br>valerate | 0.391  | 1.508 | Fresh, blackberry                               |
|             | B1  | o-Xylene                            | 0.266  | 1.240 | Sweet, floral                                   |
|             | P9  | 3-Ethylphenol                       | 0.255  | 1.117 | Smoky, sweet                                    |
|             | L4  | $\gamma$ -Decalactone               | -0.237 | 0.854 | Peach-like, coconut,<br>sweetness               |
| Acetic acid | AC1 | Butyric Acid                        | 0.151  | 1.305 | Acid                                            |
|             | AC2 | Hexanoic acid                       | 0.130  | 1.117 | Cheese                                          |
|             | E4  | Methyl hexanoate                    | -0.107 | 1.047 | Fruity, sweet                                   |
|             | B4  | o-Cymene                            | -0.121 | 0.936 | /                                               |
|             | B2  | Styrene                             | -0.136 | 0.988 | Floral                                          |
|             | T10 | Nerol                               | -0.158 | 0.954 | Lilac, floral, citrus                           |
| Jujube      | B3  | <i>p</i> -Cymene                    | -0.163 | 0.974 | Citrus, lemon, fruity                           |
|             | O9  | Phenylethyl Alcohol                 | 0.456  | 1.268 | Citrus, rose                                    |
|             | L4  | $\gamma$ -Decalactone               | 0.309  | 0.975 | Peach-like, coconut,<br>sweetness               |
|             | E11 | Benzeneacetic acid, ethyl ester     | 0.152  | 1.151 | Sweet, floral, honey,                           |

|     |                 |        |       |                                               |
|-----|-----------------|--------|-------|-----------------------------------------------|
|     |                 |        |       | rose                                          |
| PY2 | Acetylpyrazine  | 0.100  | 0.953 | Roast                                         |
| L5  | Undecanolactone | -0.288 | 0.946 | Creamy, fatty, coconut,<br>fruity, peach-like |

<sup>a</sup> Only volatile aroma substances with absolute values of standard coefficients greater than 0.1 are shown

<sup>b</sup> Positive correlation of volatile aroma substances in red;

<sup>c</sup> Negative correlation of volatile aroma substances in blue;

<sup>d</sup> Description of aroma, to see Table 4.

## References

26. Oğuz, İ.; Oğuz, H.İ.; Kafkas, N.E. Evaluation of fruit characteristics of various organically-grown goji berry (*Lycium barbarum* L., *Lycium chinense* Miller) species during ripening stages. *J. Food Compos. Anal.* **2021**, *101*, 103846.
39. Kim, J.-S.; Chung, H.Y. GC-MS Analysis of the Volatile Components in Dried Boxthorn (*Lycium chinensis*) Fruit. *J. Korean Soc. Appl. Biol. Chem.* **2009**, *52*, 516–524. <https://doi.org/10.3839/jksabc.2009.088>.
41. Niu, Y.; Wang, R.; Xiao, Z.; Zhu, J.; Sun, X.; Wang, P. Characterization of ester odorants of apple juice by gas chromatography-olfactometry, quantitative measurements, odour threshold, aroma intensity and electronic nose. *Food Res. Int.* **2019**, *120*, 92–101. <https://doi.org/10.1016/j.foodres.2019.01.064>.
42. Tamura, H.; Ueno, S.; Naka, A.; Zhao, H.; Yonekura, L.; Isogai, T.; Wakui, R.; Shiota, M. Characterisation of aroma profile and evaluation of aroma quality in sweet cream butter. *Int. Dairy J.* **2021**, *114*, 104935. <https://doi.org/10.1016/j.idairyj.2020.104935>.
43. Tan, F.; Wang, P.; Zhan, P.; Tian, H. Characterization of key aroma compounds in flat peach juice based on gas chromatography-mass spectrometry-olfactometry (GC-MS-O), odor activity value (OAV), aroma recombination, and omission experiments. *Food Chem.* **2022**, *366*, 130604. <https://doi.org/10.1016/j.foodchem.2021.130604>.
44. Tang, W.M.; Chan, E.; Kwok, C.Y.; Lee, Y.K.; Wu, J.H.; Wan, C.W.; Chan, R.Y.; Yu, P.H.; Chan, S.W. A review of the anticancer and immunomodulatory effects of *Lycium barbarum* fruit. *Inflammopharmacology* **2012**, *20*, 307–314. <https://doi.org/10.1007/s10787-011-0107-3>.
61. Lee, G.H.; Shin, Y.; Oh, M.J. Aroma-active components of *Lycii fructus* (kukija). *J. Food Sci.* **2008**, *73*, C500–C505. <https://doi.org/10.1111/j.1750-3841.2008.00851.x>.
62. Li, X.M.; Li, X.L.; Zhou, A.G. Evaluation of antioxidant activity of the polysaccharides extracted from *Lycium barbarum* fruits in vitro. *Eur. Polym. J.* **2007**, *43*, 488–497. <https://doi.org/10.1016/j.eurpolymj.2006.10.025>.
